# Supplementary material for: A Brief Photocatalytic Study of ZnO Containing Cerium towards Ibuprofen Degradation
Source: MDPI journal article supplement (doi:10.3390/ma14195891), 2021-10-08
Supplement: s1 [file s1]

# A Brief Photocatalytic Study of ZnO Containing Cerium Towards Ibuprofen Degradation

Alexandro S. Sá <sup>1</sup>, Rodrigo P. Feitosa <sup>1</sup>, Luzia Honório <sup>1</sup>, Ramón Peña-García <sup>1,2</sup>, Luciano C. Almeida <sup>3</sup>, Juliana S. Dias <sup>4</sup>, Lorena P. Brazuna <sup>4</sup>, Thiago G. Tabuti <sup>4</sup>, Eduardo R. Triboni <sup>4</sup>, Josy A. Osajima <sup>1,\*</sup> and Edson C. da Silva-Filho <sup>1,\*</sup>

<sup>1</sup> LIMAV, Interdisciplinary Laboratory for Advanced Materials, Ministro Petronio Portela, Federal University of Píauí, Teresina, Piauí 64049-550, Brazil; alexsousasa@hotmail.com (A.S.S.); rooprado@ufpi.edu.br (R.P.F.); luzia\_quimica@yahoo.com.br (L.H.); rraudelp@gmail.com (R.P.-G.)

<sup>2</sup> Federal Rural University of Pernambuco, Academic Unit of Santo Agostinho, Recife, Pernambuco, 52171-900 Brazil; luciano.calmeida@ufpe.br

<sup>3</sup> Chemical Engineering Department, Federal University of Pernambuco, Recife, Pernambuco, 52171-900, Brazil

<sup>4</sup> Laboratory of Nanotechnology and Process Engineering, Chemistry Engineering Department, University of São Paulo, Lorena 12602-810, Brazil; julianasilvaddias@gmail.com (J.S.D.); lorenaamelo1@gmail.com (L.P.B.); thiagogaleote@gmail.com (T.G.T.); tribonier@usp.br (E.R.T.)

\* Correspondence: josyosajima@ufpi.edu.br (J.A.O.); edsonfilho@ufpi.edu.br (E.C.d.S.-F.)

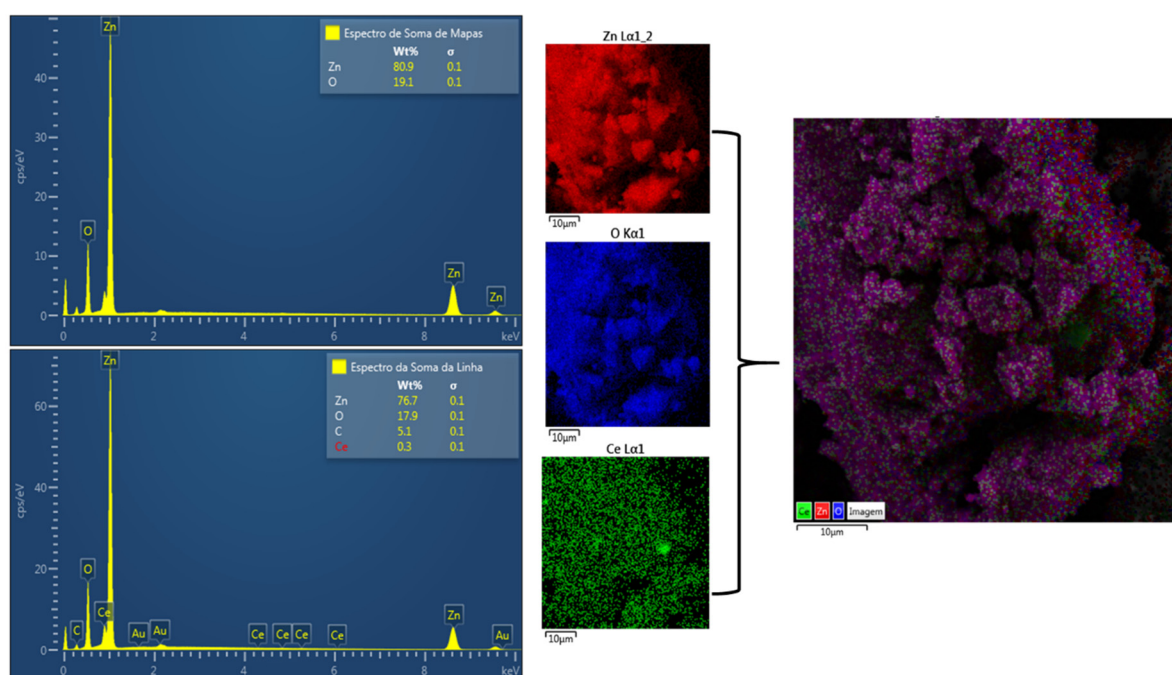

**Figure S1.** The mapping EDS and elemental mapping of ZnO-Ce.
